# Supplementary material
Source: Royal Society of Chemistry journal article supplement (https://www.rsc.org/suppdata/cc/1999/1359/902646k.doc)
Supplement: Supplementary file 1 [file 902646k.doc]

**Supplementary Figures Paper No. 9/02646K**

**Fig. 1** 500 MHz 1H NMR spectrum of a solution containing [AuCl4]- (**1**) (15 mM) and 15N-glycine (15N-**2**) (30 mM) at pH 2.44, 298 K, recorded 2.5 h after mixing. Peak assignments: **a** and **h** -CH2 and NH3+ of free Gly; **b** -CH2 of (**4**); **c** and **f** -CH2 and NH3+ groups of [AuCl3(Gly-*N*)] (**3**); **d** glyoxylic acid (6); **e** Au(III)-NH3 (**7**); **g** free NH4+ (**5**) and **i** -CH formic acid (**8**).

**a**


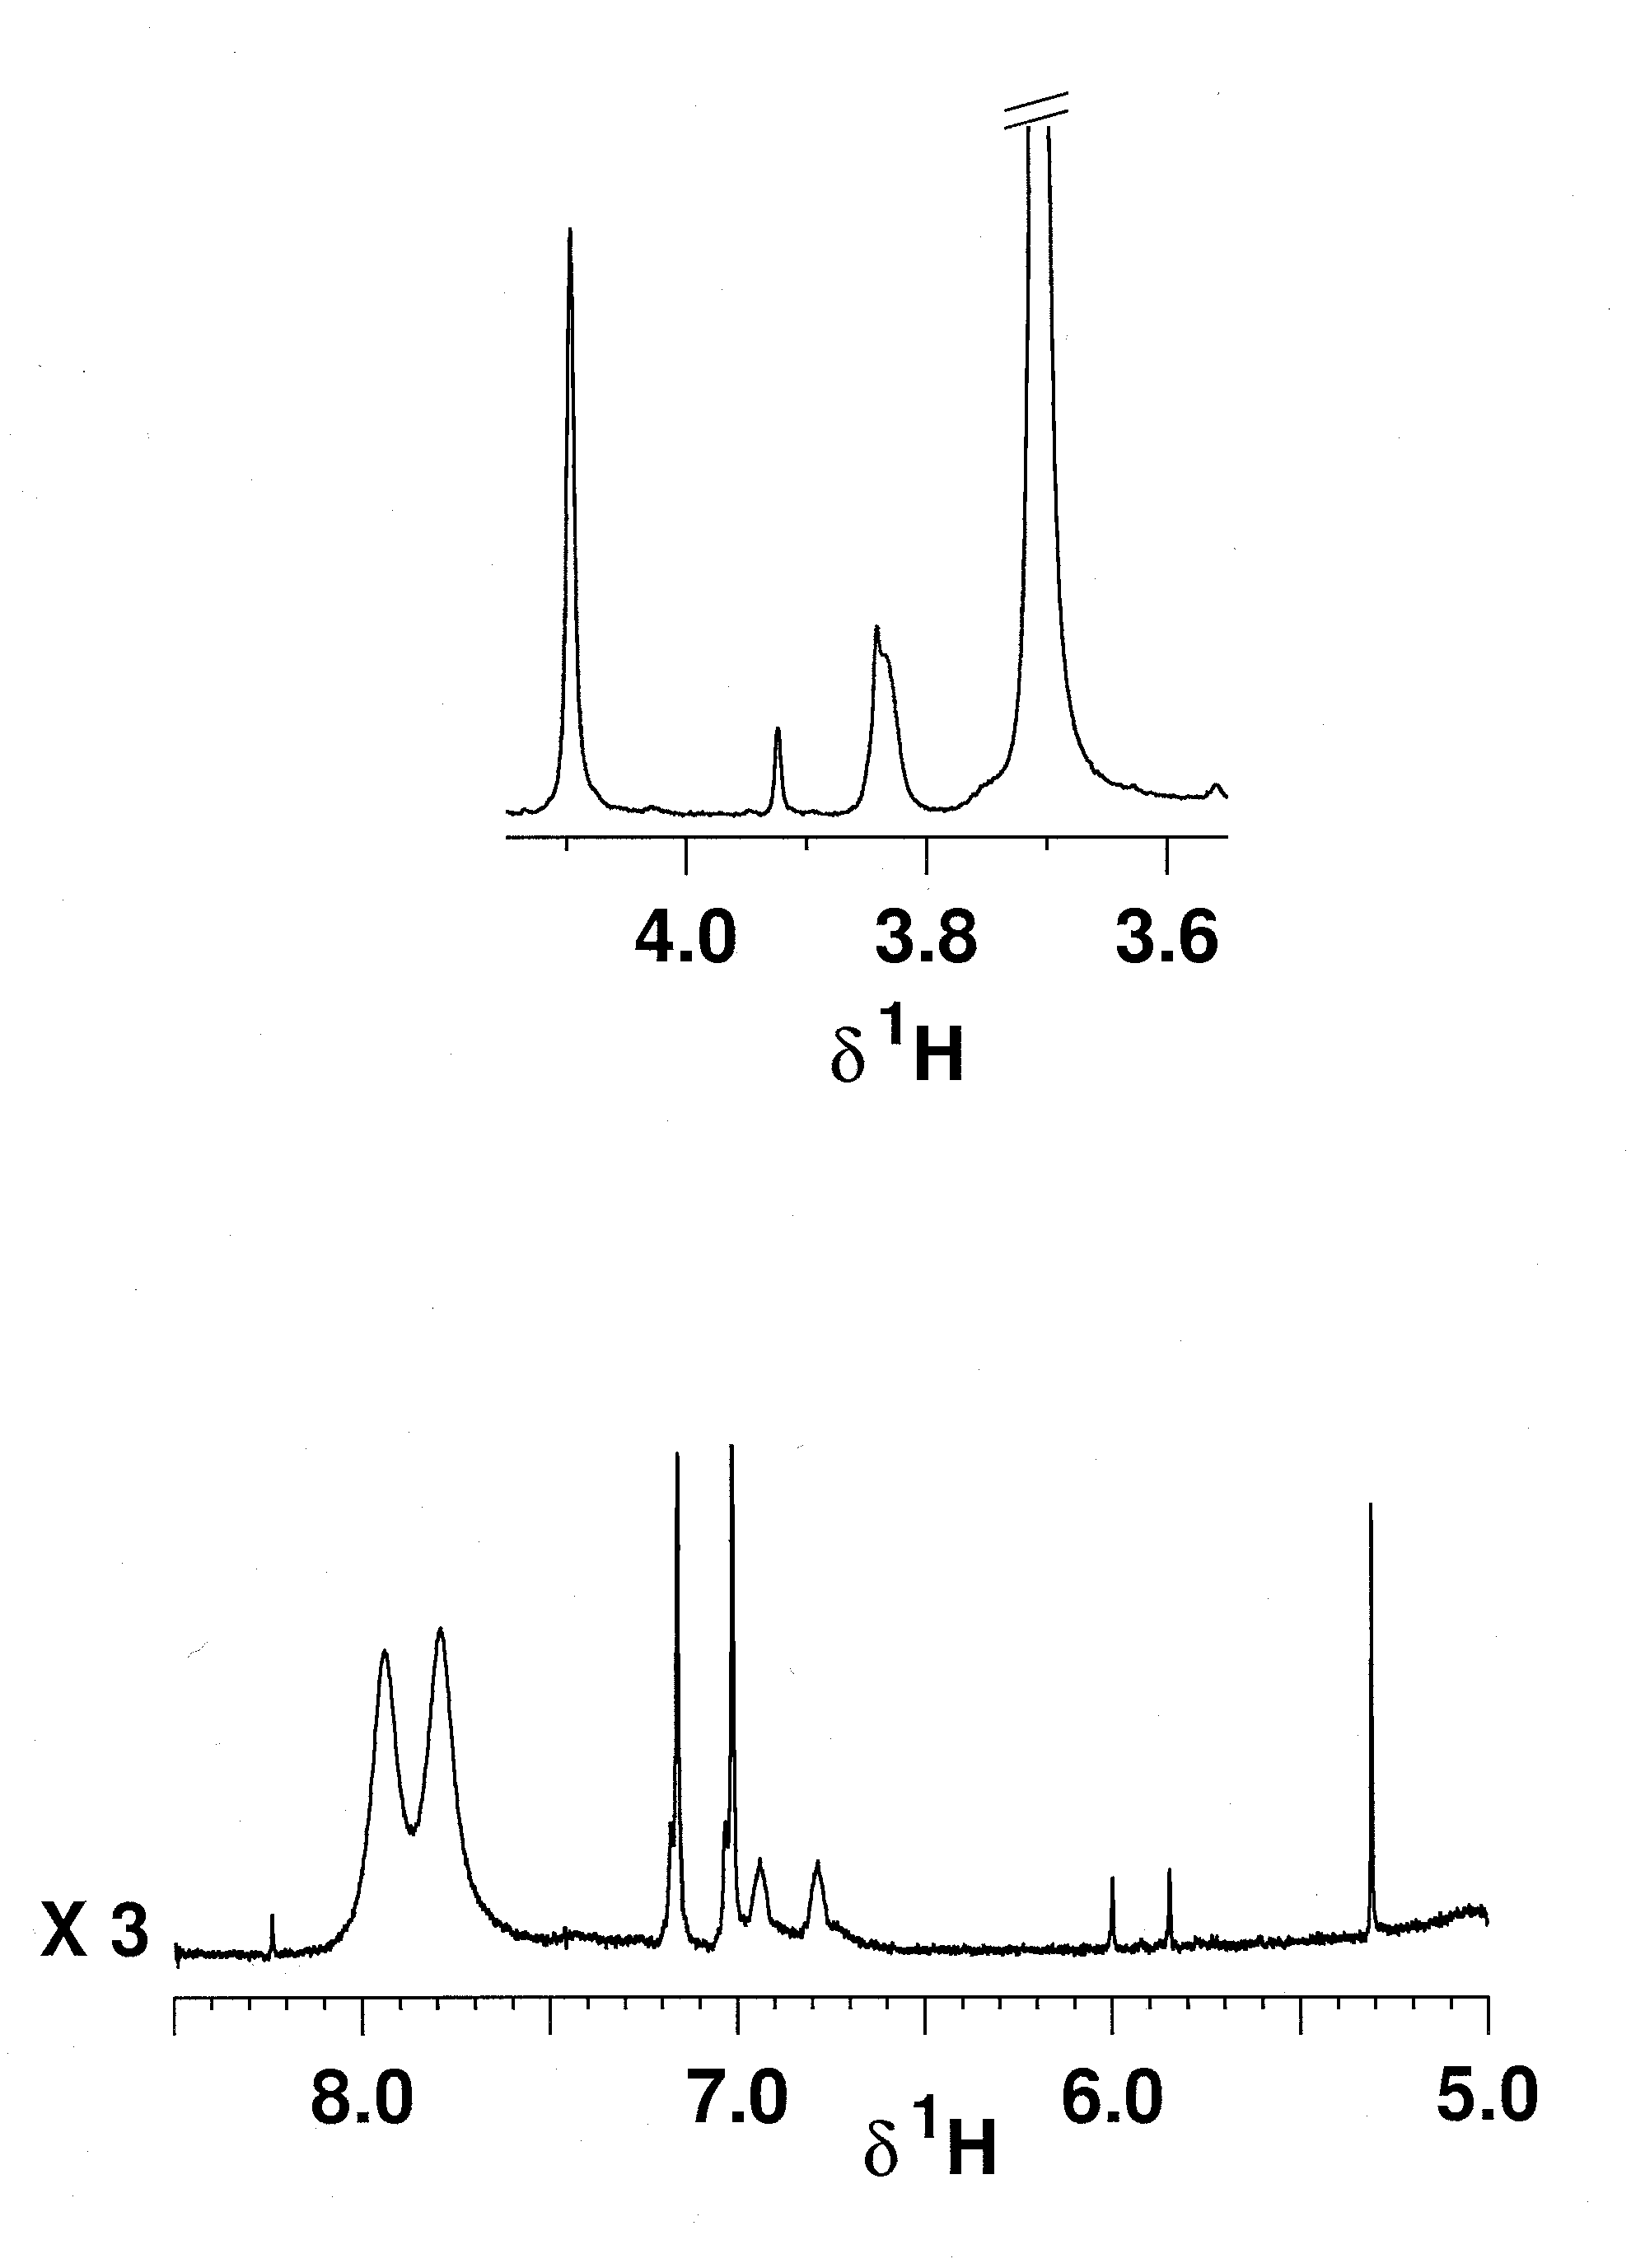


**b**

**c**

**d**

**e**

**f**

**g**

**h**

**i**

**Fig. 2** The 2D [1H,15N] HSQC-TOCSY spectrum (TOCSY mixing time = 150 ms) of a solution containing [AuCl4]- (**1**) (15 mM) and 15N-glycine (15N-**2**) (molar ratio 1:2) at 2.66, 298 K, recorded 8 h after mixing. Cross-peaks **a** and **h** are assigned to the -CH2 and -NH3+ groups of free Gly (**2**), **c** and **f** to the -CH2 and NH3+ groups of [AuCl3(Gly-*N*)] (**3**), **e** to **[**AuCl3(NH3)] (**7**) and **g** to free NH4+ (**5**). Cross-peaks **e´** and **e´´** are assigned to minor Au(III)-NH3 adducts.


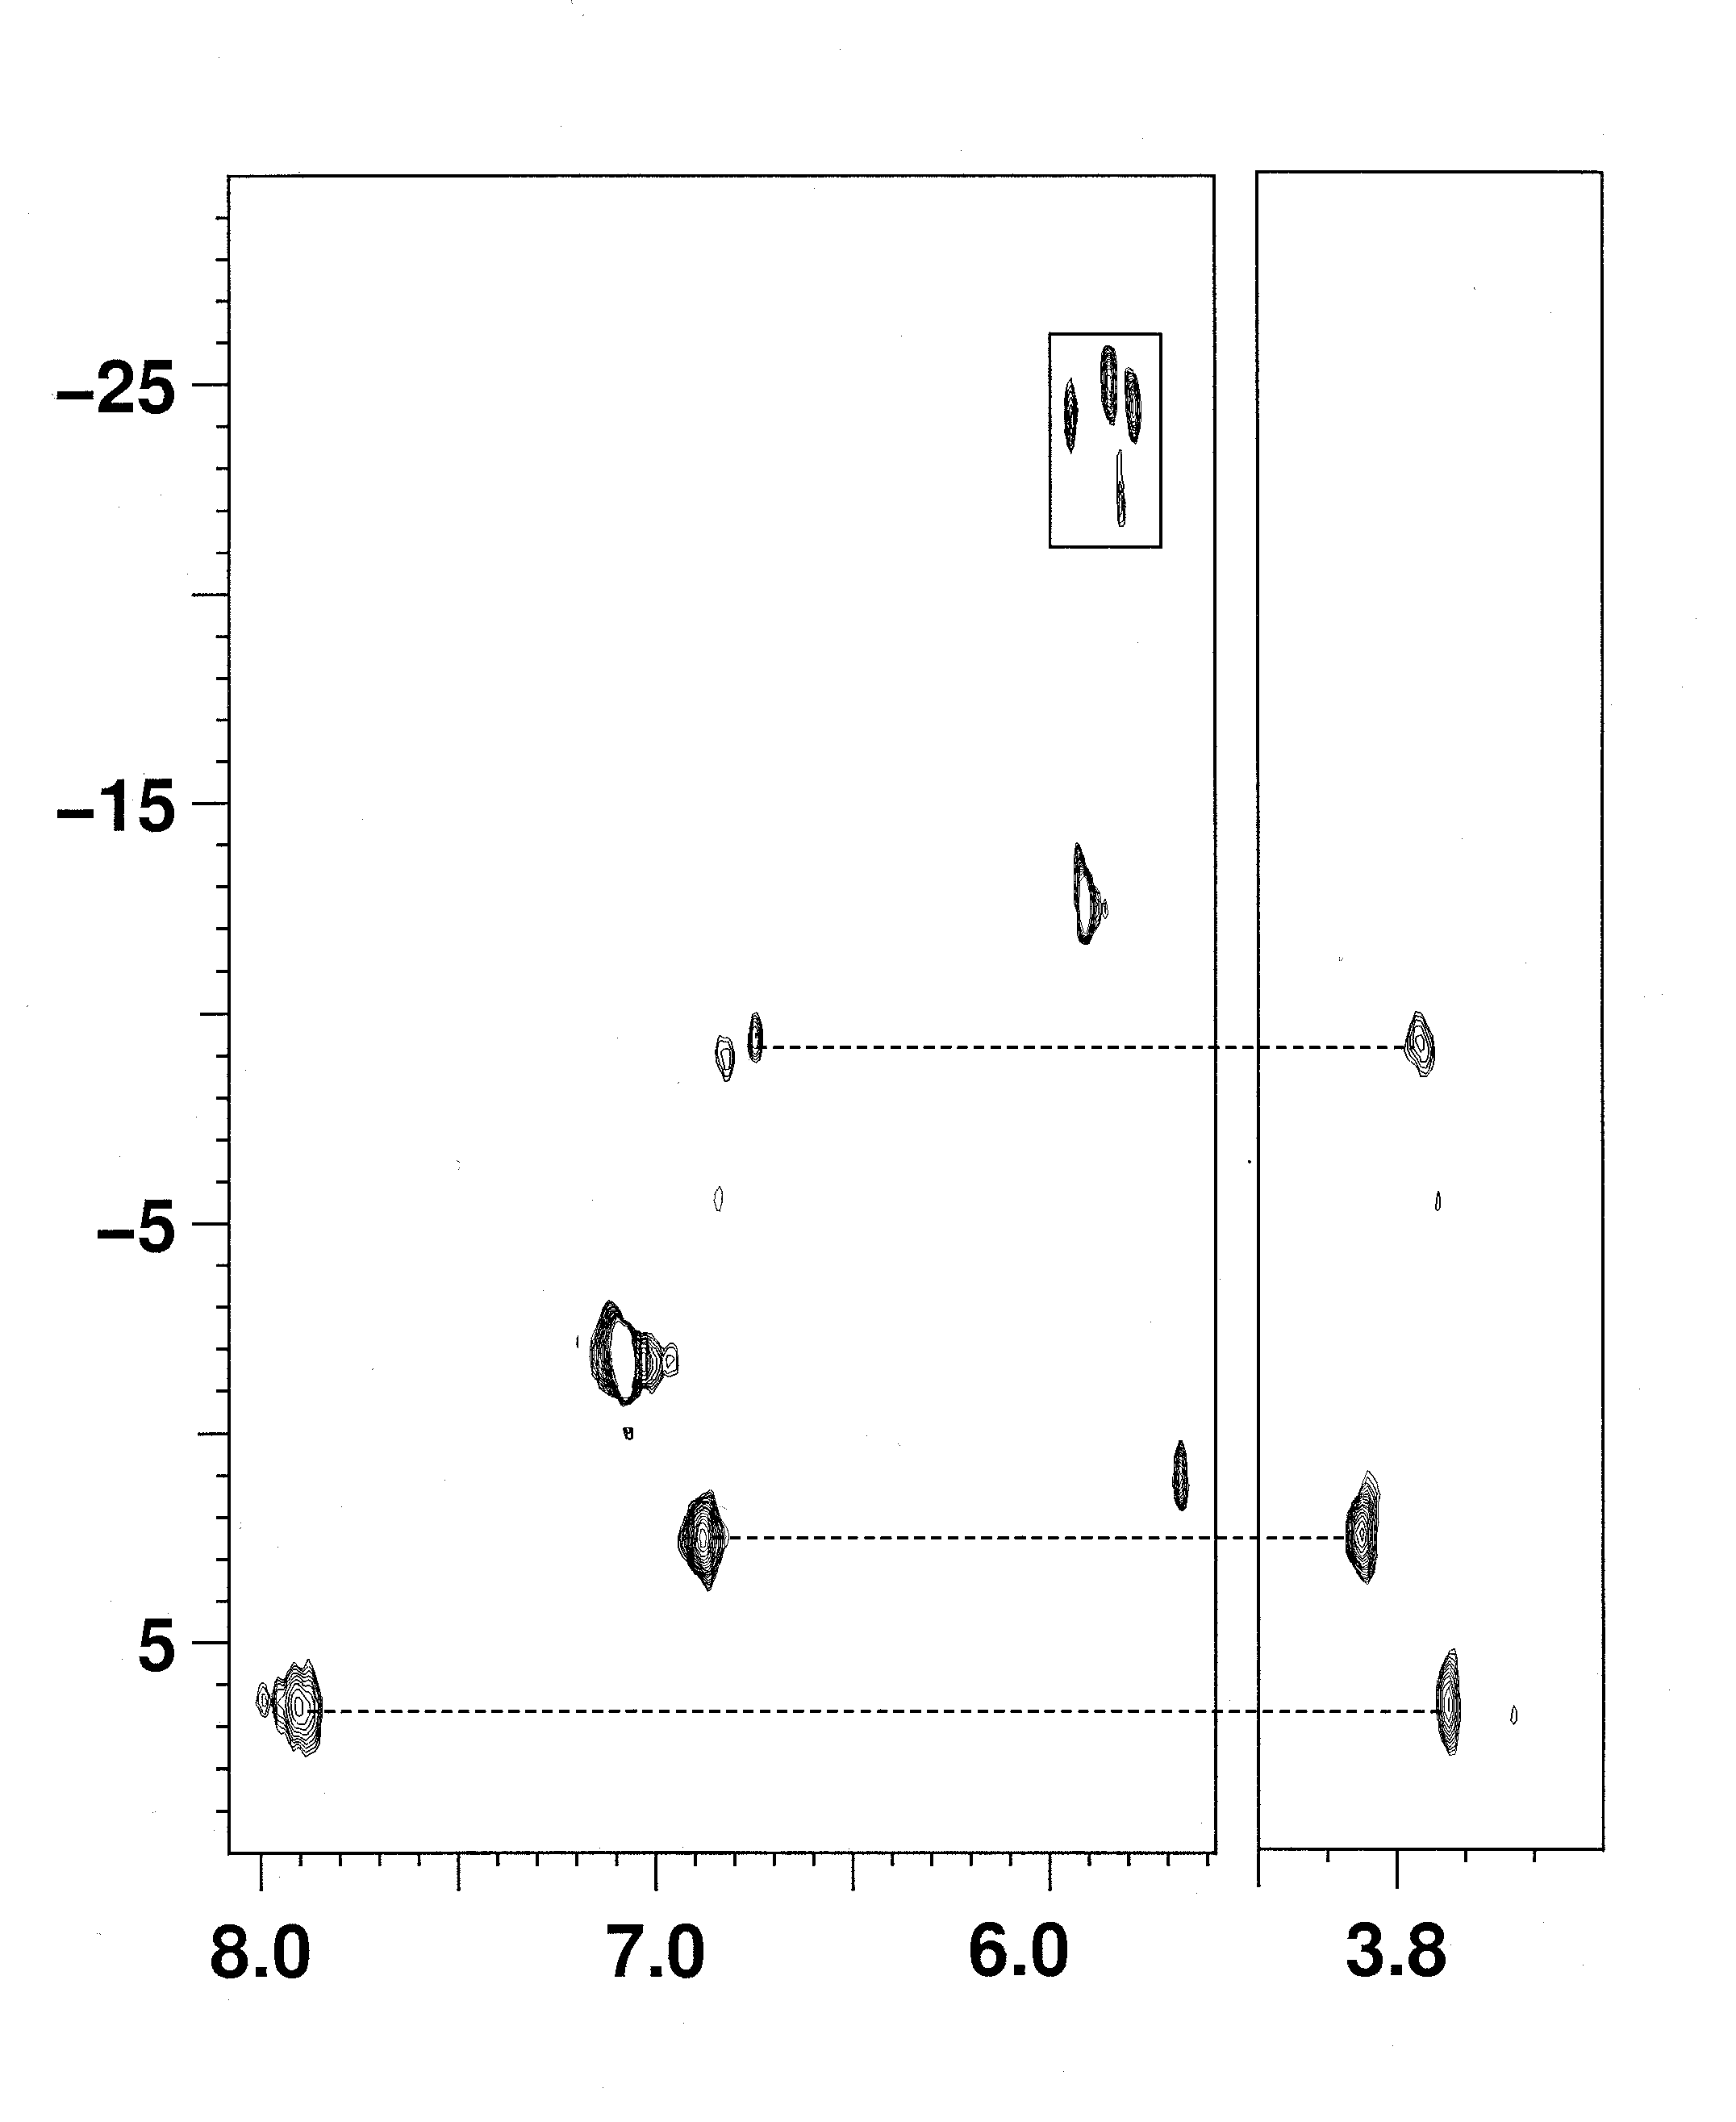


** 1H**

** 15N**

**h**

**f**

**g**

**e**

**f**

**b**

**e**

**e**

**a**

**c**
